# Supplementary material
Source: publisher site journal article supplement (https://www.dovepress.com/article/546360)
Supplement: Supplementary file 1 [file 546360%20Table%20S1_1.doc]

| KP | | | |
| --- | --- | --- | --- |
| VFclass | Virulence factors | Related genes | **zdl(Prediction)** |
| **draft (draft)** |
| Adherence | Type 3 fimbriae | mrkA | orf03366 |
| mrkB | orf03367 |
| mrkC | orf03368 |
| mrkD | orf03369 |
| mrkF | orf03370 |
| mrkH | orf03373 |
| mrkI | orf03372 |
| mrkJ | orf03371 |
| Type I fimbriae | fimA | orf03357 |
| fimB | orf03361 |
| fimC | orf03355 |
| fimD | orf02549; orf03354 |
| fimE | orf03359 |
| fimF | orf03353 |
| fimG | orf03352 |
| fimH | orf03351 |
| fimI | orf03356 |
| fimK | orf03350 |
| Antiphagocytosis | Capsule | - | orf00308; orf00309; orf00311; orf00312; orf00315; orf00318; orf00319; orf00320; orf00323; orf00324; orf00325; orf00326; orf00327; orf04776 |
| Efflux pump | AcrAB | acrA | orf01308 |
| acrB | orf01307; orf02276 |
| FarAB(Neisseria) | farB | orf03321 |
| Iron uptake | Aerobactin | iucA | orf04523 |
| iucB | orf04522 |
| iucC | orf04521 |
| iucD | orf04520 |
| iutA | orf01900; orf04519 |
| Ent siderophore | entA | orf03510 |
| entB | orf03509 |
| entC | orf03507 |
| entD | orf03496 |
| entE | orf03508 |
| entF | orf03500 |
| entS | orf03505 |
| fepA | orf03497; orf04225 |
| fepB | orf03506 |
| fepC | orf03501 |
| fepD | orf03503 |
| fepG | orf03502 |
| fes | orf03498 |
| Salmochelin | IroB | orf05293 |
| iroC | orf05292 |
| iroD | orf05291 |
| iroE | orf03141 |
| iroN | orf03914; orf05290 |
| Yersiniabactin | fyuA | - |
| irp1 | - |
| irp2 | - |
| ybtA | - |
| ybtE | - |
| ybtP | - |
| ybtQ | - |
| ybtS | - |
| ybtT | - |
| ybtU | - |
| ybtX | - |
| Nutritional factor | Allantoin utilization | allA | - |
| allB | - |
| allC | - |
| allD | - |
| allR | - |
| allS | - |
| Regulation | RcsAB | rcsA | orf00425 |
| rcsB | orf00183 |
| RmpA | rmpA | orf05285 |
| Secretion system | T6SS-I | - | orf04156 |
| - | orf04152 |
| - | orf04151 |
| clpV/tssH | orf04158 |
| dotU/tssL | orf04161 |
| hcp/tssD | orf04159 |
| icmF/tssM | orf04150 |
| impA/tssA | - |
| ompA | orf04160 |
| sciN/tssJ | orf04146 |
| tle1 | - |
| tli1 | orf04154; orf04155 |
| tssF | orf01034; orf04148 |
| tssG | orf04147 |
| vasE/tssK | orf04162 |
| vgrG/tssI | orf04157 |
| vipA/tssB | orf04164 |
| vipB/tssC | orf04163 |
| T6SS-II | clpV | orf05308 |
| dotU | - |
| icmF | - |
| impF | - |
| impH | - |
| impJ | - |
| ompA | - |
| sciN | - |
| vasA/impG | - |
| vgrG | - |
| T6SS-III | - | - |
| - | - |
| - | - |
| - | - |
| - | - |
| - | orf01028 |
| - | orf01027 |
| dotU | orf01048 |
| icmF | orf01035 |
| impA | orf01029 |
| impF | orf01030 |
| impG | - |
| impH | orf01032 |
| impJ | - |
| lysM | - |
| ompA | orf01047 |
| sciN | orf01031 |
| vgrG | orf01045 |
| Serum resistance | LPS rfb locus | - | orf00331; orf00332; orf00333; orf00334; orf00335; orf00336; orf00337 |
| Toxin | Colibactin | clbA | - |
| clbB | - |
| clbC | - |
| clbD | - |
| clbE | - |
| clbF | - |
| clbG | - |
| clbH | - |
| clbI | - |
| clbJ | - |
| clbK | - |
| clbL | - |
| clbM | - |
| clbN | - |
| clbO | - |
| clbP | - |
| clbQ | - |
| clbS | - |
| Acid resistance | Urease(Helicobacter) | ureB | orf03314 |
| ureG | orf03311 |

Table S1. Results of whole-genome sequencing analysis.
